# Supplementary material for: Emergy Evaluation of a Production and Utilization Process of Irrigation Water in China
Source: Hindawi journal article supplement (doi:10.1155/2013/438317), 2013-01-01
Supplement: f1 [file 438317.f1.pdf]

## Appendix A: Footnotes to Table 2.

|    |                                       |                              |                                                                                                                        |
|----|---------------------------------------|------------------------------|------------------------------------------------------------------------------------------------------------------------|
| 1  | Water taken from the local river      |                              |                                                                                                                        |
|    | Volume                                |                              | $= (5.85E+05 \text{ m}^3/\text{year}) / 0.98$ (dividing the volume value of No. 15 in Table 2 by the                   |
|    | pumping station's efficiency of 0.98) |                              | $= 5.97E+05 \text{ m}^3/\text{year}$                                                                                   |
|    | Energy (J)                            |                              | $= (5.97E+05 \text{ m}^3/\text{year}) \times (1.0E+06 \text{ g/m}^3) \times (4.92 \text{ J/g})$                        |
|    |                                       |                              | $= 2.94 \text{ E}+12 \text{ J/year}$                                                                                   |
| 2  | Soil                                  |                              |                                                                                                                        |
|    | Volume                                |                              | $= 60 \text{ m}^3 + 1500 \text{ m}^3$ (for the construction of the irrigation pumping station and                      |
|    | irrigation canals, respectively)      |                              | $= 1560 \text{ m}^3$                                                                                                   |
|    | Life span of infrastructure           | $= 30 \text{ years}$         |                                                                                                                        |
|    | Coefficient                           |                              | $= 10\%$ (The final residual value of the fixed assets approximated 10% of the                                         |
|    | construction costs) [4]               |                              | $= (1560 \text{ m}^3) \times (2.7E+06 \text{ g/m}^3) \times (1 - 10\%) / (30\text{years})$                             |
|    | Total weight                          |                              | $= 1.26E+08 \text{ g/year}$                                                                                            |
| 3  | Water used by cement                  |                              |                                                                                                                        |
|    | Volume                                |                              | $= 0.44 \times (341.8 \text{ t}) \times (1.0E+6 \text{ g/t}) / (1.0E+06 \text{ g/m}^3)$ (assumed to be 44% of the      |
|    | weight of cement used)                |                              | $= 150.392 \text{ m}^3$                                                                                                |
|    | Energy (J)                            |                              | $= (150.392 \text{ m}^3) \times (1.0E+6 \text{ g/m}^3) \times (4.92 \text{ J/g}) \times (1 - 10\%) / (30\text{years})$ |
|    |                                       |                              | $= 2.22E+7 \text{ J/year}$                                                                                             |
| 4  | Cement                                |                              |                                                                                                                        |
|    | Weight                                |                              | $= 25 \text{ t} + 316.8 \text{ t}$ (for the construction of the irrigation pumping station and irrigation              |
|    | canals, respectively)                 |                              | $= 341.8 \text{ t}$                                                                                                    |
|    | Total weight                          |                              | $= (341.8 \text{ t}) \times (1.0E+6 \text{ g/t}) \times (1 - 10\%) / (30\text{years})$                                 |
|    |                                       |                              | $= 1.03E+07 \text{ g/year}$                                                                                            |
| 5  | Sand                                  |                              |                                                                                                                        |
|    | Weight                                |                              | $= 80 \text{ t} + 829 \text{ t}$ (for the construction of the irrigation pumping station and irrigation                |
|    | canals, respectively)                 |                              | $= 909 \text{ t}$                                                                                                      |
|    | Total weight                          |                              | $= (909 \text{ t}) \times (1.0E+6 \text{ g/t}) \times (1 - 10\%) / (30\text{years})$                                   |
|    |                                       | $= 2.73E+07 \text{ g/year}$  |                                                                                                                        |
| 6  | Stone                                 |                              |                                                                                                                        |
|    | Weight                                |                              | $= 90 \text{ t} + 1030 \text{ t}$ (for the construction of the irrigation pumping station and irrigation               |
|    | canals, respectively)                 |                              | $= 1120 \text{ t}$                                                                                                     |
|    | Total weight                          |                              | $= (1120 \text{ t}) \times (1.0E+6 \text{ g/t}) \times (1 - 10\%) / (30\text{years})$                                  |
|    |                                       | $= 3.36E+07 \text{ g/year}$  |                                                                                                                        |
| 7  | Steel                                 |                              |                                                                                                                        |
|    | Weight                                |                              | $= 2 \text{ t}$ (for the construction of the irrigation pumping station)                                               |
|    | Total weight                          |                              | $= (2 \text{ t}) \times (1.0E+6 \text{ g/t}) \times (1 - 10\%) / (30\text{years})$                                     |
|    |                                       | $= 6.00E+04 \text{ g/year}$  |                                                                                                                        |
| 8  | Brick                                 |                              |                                                                                                                        |
|    | Quantity                              |                              | $= 4000 + 160000$ (for the construction of the irrigation pumping station                                              |
|    | and irrigation canals, respectively)  |                              | $= 164000$                                                                                                             |
|    | Volume                                |                              | $= 164000 \times (240 \text{ mm} \times 115 \text{ mm} \times 53 \text{ mm}) / (1.0E+9 \text{ m}^3 / \text{mm}^3)$     |
|    |                                       |                              | $= 239.9 \text{ m}^3$                                                                                                  |
|    | Total weight                          |                              | $= (239.9 \text{ m}^3) \times (2.5E+6 \text{ g} / \text{m}^3) \times (1 - 10\%) / (30\text{years})$                    |
|    |                                       | $= 1.80E+07 \text{ g/year}$  |                                                                                                                        |
| 9  | Machinery                             |                              |                                                                                                                        |
|    | Costs                                 |                              | $= 10380 \text{ \$}$ (Three sets of pumps and other machineries used in 30 years)                                      |
|    | Yearly costs                          |                              | $= (10380 \text{ \$}) \times (1 - 10\%) / (30 \text{ years})$                                                          |
|    |                                       | $= 3.11E+02 \text{ \$/year}$ |                                                                                                                        |
| 10 | Temporary works                       |                              |                                                                                                                        |
|    | Costs                                 |                              | $= \$ 992$ (for the construction of the irrigation pumping station)                                                    |
|    | Yearly costs                          |                              | $= (992 \text{ \$}) \times (1 - 10\%) / (30 \text{ years})$                                                            |
|    |                                       | $= 2.98E+01 \text{ \$/year}$ |                                                                                                                        |
| 11 | Electricity                           |                              |                                                                                                                        |

|                                                                        |                                                                                                                                               |
|------------------------------------------------------------------------|-----------------------------------------------------------------------------------------------------------------------------------------------|
| Volume of pumped water                                                 | = 5.97E+05 m <sup>3</sup> /year (No. 1 in Table 3)                                                                                            |
| Energy (J)                                                             | = (5.97E+05 m <sup>3</sup> /year) / (792 m <sup>3</sup> /h) × (22 kW) (3.6×10 <sup>6</sup> J/ (kW·h))<br>= 5.97E+10 J/year                    |
| 12 Labor                                                               |                                                                                                                                               |
| Costs for the construction respectively)                               | = 1717 \$ + 12580 \$ (for the construction of the irrigation pumping station and irrigation canals, respectively)<br>= 14297 \$               |
| Costs for the operation respectively)                                  | = 360 \$/year + 2700 \$/year (for the irrigation pumping station and irrigation canals, respectively)<br>= 3060 \$/year                       |
| Yearly costs                                                           | = (14297 \$) × (1 -10%) / (30 years) + 3060 \$/year<br>= 3.49E+03 \$/year                                                                     |
| 13 Other costs (e.g. construction management, production preparation ) |                                                                                                                                               |
| Costs respectively)                                                    | = 1274 \$ + 4802.7 \$ (for the irrigation pumping station and irrigation canals, respectively)<br>= 6076.7 \$                                 |
| Yearly costs                                                           | = (6076.7 \$) × (1 -10%) / (30 years)<br>= 1.82E+02 \$/year                                                                                   |
| 14 Maintenance                                                         |                                                                                                                                               |
| Yearly costs respectively)                                             | = 1110 \$/year + 253 \$/year (for the irrigation pumping station and irrigation canals, respectively)<br>= 1.36E+03 \$/year                   |
| 15 Irrigation water                                                    |                                                                                                                                               |
| Volume a typical dry year)                                             | = (585 m <sup>3</sup> /Mu) × (900 Mu) / (1 year) (585 m <sup>3</sup> /Mu, the annual irrigation quota is in<br>= 5.27E+5 m <sup>3</sup> /year |
| Energy (J)                                                             | = (5.27E+5 m <sup>3</sup> /year) × (1.0 E+6 g/m <sup>3</sup> ) × (4.92 J/g)<br>= 2.59E+12 J/year                                              |
| Required emergy (sej)                                                  | = 4.45E+17 (the total emergy yield in Table 2)<br>= 4.45E+17 sej/year                                                                         |
| Transformity                                                           | = (4.45E+17 sej/year) / (2.59E+12 J/year)<br>= 1.72E+05 sej/J                                                                                 |

---

## Appendix B: Footnotes to Table 3.

|                              |                                                                                                                                                                          |
|------------------------------|--------------------------------------------------------------------------------------------------------------------------------------------------------------------------|
| 1 Sunlight                   |                                                                                                                                                                          |
| Area                         | = 6.0E+05 m <sup>2</sup>                                                                                                                                                 |
| Insolation                   | = 4.94E+09 J/m <sup>2</sup> [25]                                                                                                                                         |
| Albedo                       | = 13.5%                                                                                                                                                                  |
| Rice growth stage            | = 99 days (from 10 June to 15 September)                                                                                                                                 |
| Energy (J)                   | = (6.0E+05 m <sup>2</sup> ) × (4.94E+09 J/m <sup>2</sup> ) × (1-13.5%) × 99 days / (365days/year)<br>= 6.96E+14 J/year                                                   |
| 2 Wind, kinetic energy       |                                                                                                                                                                          |
| Density of Air               | = 1.23 kg/m <sup>3</sup>                                                                                                                                                 |
| Average annual wind velocity | = 2.43 m/s                                                                                                                                                               |
| Drag Coefficient             | = 1.00E-03                                                                                                                                                               |
| Energy (J)                   | = (6.0E+05 m <sup>2</sup> ) × (1.23 kg/m <sup>3</sup> ) × (1.00E-3) × (10/6 × 2.42 m/s) <sup>3</sup> × (3.15E+07 s/year) × 99 days / (365days/year)<br>= 4.14E+11 J/year |
| 3 Rain, geopotential         |                                                                                                                                                                          |
| Rainfall                     | = 0.279 m (in the rice growth stage from 10 June to 15 September)                                                                                                        |
| Avg. Elev                    | = 6 m                                                                                                                                                                    |
| Energy (J)                   | = (6.0E+05 m <sup>2</sup> ) × (0.279 m) × (1E+03 kg/m <sup>3</sup> ) × (9.8 m/s <sup>2</sup> ) × (6 m)<br>= 9.83E+09 J/year                                              |
| 4 Rain, chemical             |                                                                                                                                                                          |
| Gibb's free energy           | = 4.94 J/g [25]                                                                                                                                                          |
| Energy (J)                   | = (6.0E+05 m <sup>2</sup> ) × (0.279 m) × (1E+6 g/m <sup>3</sup> ) × (4.94 J/g)<br>= 8.26E+11 J/year                                                                     |
| 5 Irrigation water           |                                                                                                                                                                          |

|                                    |                                |                                                                                                                    |
|------------------------------------|--------------------------------|--------------------------------------------------------------------------------------------------------------------|
| Volume<br>a typical dry year)      |                                | = (585 m <sup>3</sup> /Mu) × (900 Mu) / (1 year) (585 m <sup>3</sup> /Mu, the annual irrigation quota is in        |
|                                    | = 5.27E+5 m <sup>3</sup> /year |                                                                                                                    |
| Energy (J)                         |                                | = (5.27 E+5 m <sup>3</sup> /year) × (1E+6 g/m <sup>3</sup> ) × (4.92 J/g)                                          |
|                                    |                                | = 2.59E+12 J/year                                                                                                  |
| 6 Net top soil loss                |                                |                                                                                                                    |
| Soil loss                          |                                | = 200 g/m <sup>2</sup> /year                                                                                       |
| Average organic content            | = 2 %                          |                                                                                                                    |
| Energy (J)                         |                                | = (6.0E+05 m <sup>2</sup> ) × (200 g/m <sup>2</sup> /year) × 2 % × (1E+6 g/m <sup>3</sup> ) × (5.4 kcal/g) × (4186 |
| J/kcal) × 99 days / (365days/year) |                                |                                                                                                                    |
|                                    | = 1.47E+10 J/year              |                                                                                                                    |
| 7 Nitrogenous fertilizer           |                                |                                                                                                                    |
| Irrigated rice field               | = 900 Mu                       |                                                                                                                    |
| Weight                             |                                | = 14.24 kg/Mu/year                                                                                                 |
| Total weight                       |                                | = 900 Mu × 14.24 kg/Mu/year × 1000 g/kg                                                                            |
|                                    |                                | = 1.28E+07 g/year                                                                                                  |
| 8 Phosphate fertilizer             |                                |                                                                                                                    |
| Weight                             |                                | = 0.72 kg/Mu/year                                                                                                  |
| Total weight                       |                                | = 900 Mu × 0.72 kg/Mu/year × 1000 g/kg                                                                             |
|                                    |                                | = 6.48E+05 g/year                                                                                                  |
| 9 Compound fertilizer              |                                |                                                                                                                    |
| Weight                             |                                | = 9.4 kg/Mu/year                                                                                                   |
| Total weight                       |                                | = 900 Mu × 9.4 kg/Mu/year × 1000 g/kg                                                                              |
|                                    |                                | = 8.46E+06 g/year                                                                                                  |
| 10 Pesticide                       |                                |                                                                                                                    |
| Weight                             |                                | = 3 kg/Mu/year                                                                                                     |
| Total weight                       |                                | = 900 Mu × 3 kg/Mu/year × 1000 g/kg                                                                                |
|                                    |                                | = 2.70E+06 g/year                                                                                                  |
| 11 Hybrid seeds                    |                                |                                                                                                                    |
| Weight                             |                                | = 1 kg/Mu/year                                                                                                     |
| Total weight                       |                                | = 900 Mu × 1 kg/Mu/year × 1000 g/kg                                                                                |
|                                    |                                | = 9.00E+05 g/year                                                                                                  |
| 12 Leasing operating costs         |                                |                                                                                                                    |
| Costs                              |                                | = \$ 30 Mu/year                                                                                                    |
| Total costs                        |                                | = 900 Mu × \$ 30 Mu/year                                                                                           |
|                                    |                                | = 2.70E+04 \$/year                                                                                                 |
| 13 Agricultural technology service |                                |                                                                                                                    |
| Costs                              |                                | = \$ 1.8 Mu/year                                                                                                   |
| Total costs                        |                                | = 900 Mu × \$ 1.8 Mu/year                                                                                          |
|                                    |                                | = 1.62E+03 \$/year                                                                                                 |
| 14 Pumping water services          |                                |                                                                                                                    |
| Costs                              |                                | = \$ 6 Mu/year                                                                                                     |
| Total costs                        |                                | = 900 Mu × \$ 6 Mu/year                                                                                            |
|                                    |                                | = 5.40E+03 \$/year                                                                                                 |
| 15 Rice                            |                                |                                                                                                                    |
| Weight                             |                                | = 480 kg/Mu/year                                                                                                   |
| Energy (J)                         |                                | = 900 Mu × 480 kg/Mu/year × (1.51E+07 J/kg)                                                                        |
|                                    |                                | = 6.52E+12 J/year                                                                                                  |
| Required emergy (sej)              |                                | = 9.28E+17 sej/year (the total emergy yield in Table 3)                                                            |
| Transformity                       |                                | = (9.28E+17 sej/year) / (6.52E+12 J/year)                                                                          |
|                                    |                                | = 1.42E+05 sej/J                                                                                                   |

---

#### Appendix C: Footnotes to Table 4.

|                        |  |                                                                           |
|------------------------|--|---------------------------------------------------------------------------|
| 1 Sunlight             |  |                                                                           |
| Energy (J)             |  | = 6.96E+14 J/year (equals to the corresponding value of No. 1 in Table 3) |
| 2 Wind, kinetic energy |  |                                                                           |
| Energy (J)             |  | = 4.14E+11 J/year (equals to the corresponding value of No. 2 in Table 3) |
| 3 Rain, geopotential   |  |                                                                           |
| Energy (J)             |  | = 9.83E+09 J/year (equals to the corresponding value of No. 3 in Table 3) |
| 4 Rain, chemical       |  |                                                                           |

|    |                                                                     |                                                                             |
|----|---------------------------------------------------------------------|-----------------------------------------------------------------------------|
|    | Energy (J)                                                          | = 8.26E+11 J/year (equals to the corresponding value of No. 4 in Table 3)   |
| 5  | Water taken from the local river                                    |                                                                             |
|    | Energy (J)                                                          | = 2.94E+12 J/year (equals to the corresponding value of No. 1 in Table 2)   |
| 6  | Net top soil loss                                                   |                                                                             |
|    | Energy (J)                                                          | = 1.47E+10 J/year (equals to the corresponding value of No. 6 in Table 3)   |
| 7  | Soil                                                                |                                                                             |
|    | Energy (J)                                                          | = 1.26E+08 g/year (equals to the corresponding value of No. 2 in Table 2)   |
| 8  | Water used by cement                                                |                                                                             |
|    | Energy (J)                                                          | = 2.22E+07 J/year (equals to the corresponding value of No. 3 in Table 2)   |
| 9  | Cement                                                              |                                                                             |
|    | Energy (J)                                                          | = 1.03E+07 g/year (equals to the corresponding value of No. 4 in Table 2)   |
| 10 | Sand                                                                |                                                                             |
|    | Energy (J)                                                          | = 2.73E+07 g/year (equals to the corresponding value of No. 5 in Table 2)   |
| 11 | Stone                                                               |                                                                             |
|    | Energy (J)                                                          | = 3.36E+07 g/year (equals to the corresponding value of No. 6 in Table 2)   |
| 12 | Steel                                                               |                                                                             |
|    | Energy (J)                                                          | = 6.00E+04 g/year (equals to the corresponding value of No. 7 in Table 2)   |
| 13 | Brick                                                               |                                                                             |
|    | Energy (J)                                                          | = 1.80E+07 g/year (equals to the corresponding value of No. 8 in Table 2)   |
| 14 | Machinery                                                           |                                                                             |
|    | Energy (J)                                                          | = 3.11E+02 \$/year (equals to the corresponding value of No. 9 in Table 2)  |
| 15 | Temporary works                                                     |                                                                             |
|    | Energy (J)                                                          | = 2.98E+01 \$/year (equals to the corresponding value of No. 10 in Table 2) |
| 16 | Electricity                                                         |                                                                             |
|    | Energy (J)                                                          | = 5.97E+10 J/year (equals to the corresponding value of No. 11 in Table 2)  |
| 17 | Nitrogenous fertilizer                                              |                                                                             |
|    | Energy (J)                                                          | = 1.28E+07 g/year (equals to the corresponding value of No. 7 in Table 3)   |
| 18 | Phosphate fertilizer                                                |                                                                             |
|    | Energy (J)                                                          | = 6.48E+05 g/year (equals to the corresponding value of No. 8 in Table 3)   |
| 19 | Compound fertilizer                                                 |                                                                             |
|    | Energy (J)                                                          | = 8.46E+06 g/year (equals to the corresponding value of No. 9 in Table 3)   |
| 20 | Pesticide                                                           |                                                                             |
|    | Energy (J)                                                          | = 2.70E+06 g/year (equals to the corresponding value of No. 10 in Table 3)  |
| 21 | Hybrid seeds                                                        |                                                                             |
|    | Energy (J)                                                          | = 9.00E+05 g/year (equals to the corresponding value of No. 11 in Table 3)  |
| 22 | Labor                                                               |                                                                             |
|    | Energy (J)                                                          | = 3.49E+03 \$/year (equals to the corresponding value of No. 12 in Table 2) |
| 23 | Other costs (e.g. construction management, production preparation ) |                                                                             |
|    | Energy (J)                                                          | = 1.82E+02 \$/year (equals to the corresponding value of No. 13 in Table 2) |
| 24 | Maintenance                                                         |                                                                             |
|    | Energy (J)                                                          | = 1.36E+03 \$/year (equals to the corresponding value of No. 14 in Table 2) |
| 25 | Leasing operating costs                                             |                                                                             |
|    | Energy (J)                                                          | = 2.70E+04 \$/year (equals to the corresponding value of No. 12 in Table 3) |
| 26 | Agricultural technology service                                     |                                                                             |
|    | Energy (J)                                                          | = 1.62E+03 \$/year (equals to the corresponding value of No. 13 in Table 3) |
| 27 | Pumping water services                                              |                                                                             |
|    | Energy (J)                                                          | = 5.40E+03 \$/year (equals to the corresponding value of No. 14 in Table 3) |
| 28 | Rice                                                                |                                                                             |
|    | Weight                                                              | = 480 kg/Mu/year                                                            |
|    | Energy (J)                                                          | = 900 Mu × 480 kg/Mu/year × (1.51E+07 J/kg)<br>= 6.52E+12 J/year            |
|    | Required emery (sej)                                                | = 9.28E+17 sej/year (the total emery yield in Table 4)                      |
|    | Transformity                                                        | = (9.28E+17 sej/year) / (6.52E+12 J/year)<br>= 1.42E+05 sej/J               |

---
